# Supplementary material for: PlaqView 2.0: A comprehensive web portal for cardiovascular single-cell genomics
Source: Front Cardiovasc Med. 2022 Aug 8;9:969421. doi: 10.3389/fcvm.2022.969421 (PMC9393487; doi:10.3389/fcvm.2022.969421)
Supplement: Supplementary file 2 [file Table_2.XLSX]

## Sheet: scRNA
Authors	Journal	Year	DOI	Species	Tissue	Notes	Population	Cell.Number	Platform	DataID	Sharing.Permission	Original.Format	Original.Data.Link	Article.Title
Alencar et al.	Circulation	2020	https://www.ahajournals.org/doi/10.1161/CIRCULATIONAHA.120.046672	Mouse	Brachiocephalic Lesions	SMC-Klf4 KO vs WT	ApoE KO mice	5628	CEL-Seq2	Alencar_2020_KLF4	Freely Available	Seurat Obj	Shared Directly	Stem Cell Pluripotency Genes Klf4 and Oct4 Regulate Complex SMC Phenotypic Changes Critical in Late-Stage Atherosclerotic Lesion Pathogenesis
Alencar et al.	Circulation	2020	https://www.ahajournals.org/doi/10.1161/CIRCULATIONAHA.120.046672	Mouse	Brachiocephalic Lesions	SMC-Dual Lineage Tracing	ApoE KO mice	2407	CEL-Seq2	Alencar_2020_dual	Freely Available	Seurat Obj	Shared Directly	Stem Cell Pluripotency Genes Klf4 and Oct4 Regulate Complex SMC Phenotypic Changes Critical in Late-Stage Atherosclerotic Lesion Pathogenesis
Alencar et al.	Circulation	2020	https://www.ahajournals.org/doi/10.1161/CIRCULATIONAHA.120.046672	Human	Carotid Artery Plaque	Endarterectomy	18 Patients	1287	CEL-Seq2	Alencar_2020	Permission Required	Count Matrix	Shared directly	Stem Cell Pluripotency Genes Klf4 and Oct4 Regulate Complex SMC Phenotypic Changes Critical in Late-Stage Atherosclerotic Lesion Pathogenesis
Alsaigh et al.	BioRxiv	2020	https://www.biorxiv.org/content/10.1101/2020.03.03.968123v1.full	Human	Carotid Artery Plaque	Endarterectomy + Adjacent	3 Patients	51981	10x Chromium	Alsaigh_2020	Freely Available	GEO Count Matrix Zip	https://www.ncbi.nlm.nih.gov/geo/query/acc.cgi?acc=GSE159677	Decoding the transcriptome of atherosclerotic plaque at single-cell resolution
Li et al.	Circulation	2020	https://www.ahajournals.org/doi/10.1161/CIRCULATIONAHA.120.046528	Human	Ascending Thoracic Aorta	Aneurysm (ATAA, low mitochondrial read cells)	11 Patients	4973	10x Chromium	Li_2020_lowmito	Freely Available	Loom	NA	Single-Cell Transcriptome Analysis Reveals Dynamic Cell Populations and Differential Gene Expression Patterns in Control and Aneurysmal Human Aortic Tissue
Li et al.	Circulation	2020	https://www.ahajournals.org/doi/10.1161/CIRCULATIONAHA.120.046528	Human	Ascending Thoracic Aorta	Aneurysm (ATAA, full data)	11 Patients	66380	10x Chromium	Li_2020	Freely Available	Loom	NA	Single-Cell Transcriptome Analysis Reveals Dynamic Cell Populations and Differential Gene Expression Patterns in Control and Aneurysmal Human Aortic Tissue
Pan et al.	Circulation	2020	https://doi.org/10.1161/CIRCULATIONAHA.120.048378	Human	Carotid Artery Plaque	Endarterectomy	3 Patients	8867	10x Chromium	Pan_2020	Freely Available	Seurat Obj	Shared Directly	Single-Cell Genomics Reveals a Novel Cell State During Smooth Muscle Cell Phenotypic Switching and Potential Therapeutic Targets for Atherosclerosis in Mouse and Human
Pan et al.	Circulation	2020	https://doi.org/10.1161/CIRCULATIONAHA.120.048378	Mouse	BCA and Ascd. Aorta	SMC-Ldlr KO vs WT	ApoE KO mice	27292	10x Chromium	Pan_2020_mouse	Freely Available	Seurat Obj	Shared Directly	Single-Cell Genomics Reveals a Novel Cell State During Smooth Muscle Cell Phenotypic Switching and Potential Therapeutic Targets for Atherosclerosis in Mouse and Human
Slenders et al.	EHJ Open	2021	https://academic.oup.com/ehjopen/advance-article/doi/10.1093/ehjopen/oeab043/6472573	Human	Carotid Artery Plaque	Endarterectomy	38 Patients	5633	CEL-Seq2	Slenders_2021	Freely Available	Seurat Obj	Shared Directly	Intersecting single-cell transcriptomics and genome-wide association studies identifies crucial cell populations and candidate genes for atherosclerosis
Wirka et al.	Nature Medicine	2019	https://doi.org/10.1038/s41591-019-0512-5	Human	Coronary Artery	Transplant	4 Patients	9798	10x Chromium	Wirka_2019	Freely Available	GEO Count Matrix	https://www.ncbi.nlm.nih.gov/geo/query/acc.cgi?acc=GSE131778	Atheroprotective roles of smooth muscle cell phenotypic modulation and the TCF21 disease gene as revealed by single-cell analysis
Wirka et al.	Nature Medicine	2019	https://doi.org/10.1038/s41591-019-0512-5	Mouse	Ascending Aorta	SMC-Tcf21 KO vs WT	ApoE KO mice	27086	10x Chromium	Wirka_2019_mouse	Freely Available	GEO Count Matrix	https://www.ncbi.nlm.nih.gov/geo/query/acc.cgi?acc=GSE131780	Atheroprotective roles of smooth muscle cell phenotypic modulation and the TCF21 disease gene as revealed by single-cell analysis
Tucker et al.	Circulation	2020	https://www.ahajournals.org/doi/10.1161/CIRCULATIONAHA.119.045401	Human	Adult Myocardium	Non-Failing Heart	7 Normal Subjects	287269	10x Chromium	Tucker_2020	Freely Available	h5ad (apended ncounts manually)	https://singlecell.broadinstitute.org/single_cell/study/SCP498/transcriptional-and-cellular-diversity-of-the-human-heart#study-download	Transcriptional and Cellular Diversity of the Human Heart
Litvinukova et al.	Nature Medicine	2020	https://www.nature.com/articles/s41586-020-2797-4	Human	Adult Heart (Whole Heart)	Healthy Reference Dataset	14 Adult Donors	486134	10x Chromium	Litvinukova_2020	Freely Available	h5ad,AnnData	www.heartcellatlas.org	Cells of the adult human heart
Litvinukova et al.	Nature Medicine	2020	https://www.nature.com/articles/s41586-020-2797-4	Human	Adult Heart Adiptocytes	Healthy Reference Dataset	14 Adult Donors	2535	10x Chromium	Litvinukova_2020_adipocyte	Freely Available	h5ad,AnnData	www.heartcellatlas.org	Cells of the adult human heart
Litvinukova et al.	Nature Medicine	2020	https://www.nature.com/articles/s41586-020-2797-4	Human	Adult Heart Atrial Cardiomyocytes	Healthy Reference Dataset	14 Adult Donors	20940	10x Chromium	Litvinukova_2020_atrial	Freely Available	h5ad,AnnData	www.heartcellatlas.org	Cells of the adult human heart
Litvinukova et al.	Nature Medicine	2020	https://www.nature.com/articles/s41586-020-2797-4	Human	Adult Heart Ventricular Cardiomyocytes	Healthy Reference Dataset	14 Adult Donors	109802	10x Chromium	Litvinukova_2020_ventricular	Freely Available	h5ad,AnnData	www.heartcellatlas.org	Cells of the adult human heart
Litvinukova et al.	Nature Medicine	2020	https://www.nature.com/articles/s41586-020-2797-4	Human	Adult Heart Fibroblasts	Healthy Reference Dataset	14 Adult Donors	55168	10x Chromium	Litvinukova_2020_fibroblast	Freely Available	h5ad,AnnData	www.heartcellatlas.org	Cells of the adult human heart
Litvinukova et al.	Nature Medicine	2020	https://www.nature.com/articles/s41586-020-2797-4	Human	Adult Heart Immune Cells	Healthy Reference Dataset	14 Adult Donors	28892	10x Chromium	Litvinukova_2020_immune	Freely Available	h5ad,AnnData	www.heartcellatlas.org	Cells of the adult human heart
Litvinukova et al.	Nature Medicine	2020	https://www.nature.com/articles/s41586-020-2797-4	Human	Adult Heart Neuronal Cells	Healthy Reference Dataset	14 Adult Donors	3569	10x Chromium	Litvinukova_2020_neuronal	Freely Available	h5ad,AnnData	www.heartcellatlas.org	Cells of the adult human heart
Litvinukova et al.	Nature Medicine	2020	https://www.nature.com/articles/s41586-020-2797-4	Human	Adult Heart Vascular Tissue	Healthy Reference Dataset	14 Adult Donors	137552	10x Chromium	Litvinukova_2020_vascular	Freely Available	h5ad,AnnData	www.heartcellatlas.org	Cells of the adult human heart
Litvinukova et al.	Nature Medicine	2020	https://www.nature.com/articles/s41586-020-2797-4	Human	Adult Skeletal Muscle	Healthy Reference Dataset	5 Adult Donors	51129	10x Chromium	Litvinukova_2020_skeletal	Freely Available	h5ad,AnnData	www.heartcellatlas.org	Cells of the adult human heart
Zernecke et al.	BioRxiv	2020	https://doi.org/10.1101/2020.12.09.417535	Mouse	Aorta	Meta-analysis	Healthy vs Athero	18287	Multiple	Zernecke_2020_mouse	Freely Available	Seurat	Shared Directly	Integrated scRNA-seq analysis identifies conserved transcriptomic features of mononuclear phagocytes in mouse and human atherosclerosis
Zernecke et al.	BioRxiv	2020	https://doi.org/10.1101/2020.12.09.417535	Human	Coronary Arteries and Carotid Endarterectomy	Meta-analysis of Immune Cells	11 Patients (Wirka + Fernandez)	2890	Multiple	Zernecke_2020	Freely Available	Seurat	Shared Directly	Integrated scRNA-seq analysis identifies conserved transcriptomic features of mononuclear phagocytes in mouse and human atherosclerosis
Delorey et al.	BioRxiv	2021	https://www.biorxiv.org/content/10.1101/2021.02.25.430130v1.full	Human	Decreased Pt Heart	COVID-19 Autopsies	17 Deceased COVID Patients	35961	10x Chromium	Delorey_2021	Freely Available	h5ad	https://singlecell.broadinstitute.org/single_cell/study/SCP1216/covid-19-heart-autopsy-samples#study-summary	A single-cell and spatial atlas of autopsy tissues reveals pathology and cellular targets of SARS-CoV-2
Andueza et al.	Cell Report	2020	https://doi.org/10.1016/j.celrep.2020.108491	Mouse	Carotid Arteries	D-flow vs S-flow	PCL Mice	18324	10x Chromium	Andueza_2020	Freely Available	Seurat	Shared Directly	Endothelial Reprogramming by Disturbed Flow Revealed by Single-Cell RNA and Chromatin Accessibility Study
Dobnikar et al.	Nature Communications	2018	https://doi.org/10.1038/s41467-018-06891-x	Mouse	Aortic Arch and Descending Thoracic Segments	Myh11-CreERt2/EYFP and Myh11-CreERt2/Confetti	Myh11-CreERt2/Confetti Mouse	2817	10x Chromium	Dobnikar_2018	Freely Available	Seurat	Shared Directly	Disease-relevant transcriptional signatures identified in individual smooth muscle cells from healthy mouse vessels
Gu et al.	ATVB	2019	https://doi.org/10.1161/ATVBAHA.119.312399	Mouse	Adventitial Tissue	ApoE KO Mouse Atlas	ApoE KO vs WT	4943	10x Chromium	Gu_2019	Freely Available	Seurat	Shared Directly	Adventitial Cell Atlas of wt (Wild Type) and ApoE (Apolipoprotein E)-Deficient Mice Defined by Single-Cell RNA Sequencing
Xu et al.	ATVB	2020	https://www.ahajournals.org/doi/10.1161/ATVBAHA.120.314789	Human	Aorta Valves Leaflets	Calcified vs Healthy Valves	6 Patients	34632	10x Chromium	Xu_2020	Freely Available	SRA/FASTQ	https://www.ncbi.nlm.nih.gov/sra?linkname=bioproject_sra_all&from_uid=562645	scRNA-seq of the aortic leaf in 4 calcified aortic valve disease pt vs 2 healthy.
Chowdhury et al.	Circulation Research	2022	https://www.ahajournals.org/doi/10.1161/CIRCRESAHA.121.320090	Human	Advanced Coronary Plaques	Disease staged from normal to obstructive	35 Adult Donors	12549	10x Chromium	Chowdhury_2022	Freely Available	Count Matrix	https://www.ncbi.nlm.nih.gov/geo/query/acc.cgi?acc=GSE196943	Human Coronary Plaque T Cells Are Clonal and Cross-React to Virus and Self
Zhao et al.	Frontiers in Cell and Developmental Biology	2021	https://www.frontiersin.org/articles/10.3389/fcell.2021.689469/full#h6	Mouse	Heart and Aorta	Standard vs High-Fat Diet	Ldlr KO Mice	1945	10x Chromium	Zhao_2021	Freely Available	GEO Count Matrix	https://www.ncbi.nlm.nih.gov/geo/query/acc.cgi?acc=GSE169332	scRNA-seq of 'healthy' mouse vs high-fat diet mouse, but mouse are not WT
Yang et al.	Nature	2022	https://www.nature.com/articles/s41586-021-04369-3	Human	Hippocampus, Superior Frontal Cortex	Brain Vessels of Pt with Alzheimers Disease	9 AD vs 8 Normal	138629	10x Chromium	Yang_2022	Freely Available	10x Output	https://cells-test.gi.ucsc.edu/?ds=brain-vasc-atlas	A human brain vascular atlas reveals diverse mediators of Alzheimer’s risk
Hu et al.	ATVB	2019	https://www.ahajournals.org/doi/full/10.1161/ATVBAHA.120.315373	Human	Coronary Arteries (9), Aorta (3), Pulmonary Art. (2)	Non-diseased segments	3 Patients	104981	10x Chromium	Hu_2019	Freely Available	10x Output	https://zenodo.org/record/6032099#.YgU9Ud_MJPY	Single-Cell Transcriptomic Atlas of Different Human Cardiac Arteries Identifies Cell Types Associated With Vascular Physiology
